# Supplementary material
Source: PubMed Central journal article supplement (PMC4187745)
Supplement: JCM.01144-14_zjm999093733so1.pdf [file JCM.01144-14_zjm999093733so1.pdf]

1 **Table S1. Genome re-sequencing mapping statistics for eleven *M. abscessus* clinical isolates**  
 2 **from patients at NJH compared to the *M. abscessus* reference genome of type strain ATCC**  
 3 **19977<sup>T</sup>.**

| <b>NJH <i>M. abscessus</i> isolates</b>     |          |          |          |          |          |          |          |          |          |           |           |
|---------------------------------------------|----------|----------|----------|----------|----------|----------|----------|----------|----------|-----------|-----------|
| <b>Mapping<br/>Statistic</b>                | <b>1</b> | <b>2</b> | <b>3</b> | <b>4</b> | <b>5</b> | <b>6</b> | <b>7</b> | <b>8</b> | <b>9</b> | <b>10</b> | <b>11</b> |
| <b>Total Reads<br/>(M)<sup>a</sup></b>      | 17.8     | 10.3     | 17.3     | 21.3     | 23.6     | 23.2     | 24.6     | 21.4     | 17.0     | 18.7      | 19.2      |
| <b>% Reads<br/>mapped to<br/>chromosome</b> | 73.4     | 77.7     | 77.6     | 77.9     | 70.1     | 75.9     | 64.2     | 63.3     | 75.4     | 76.9      | 55.3      |
| <b>No. Reads<br/>mapped to<br/>plasmid</b>  | 11       | 10       | 6        | 17       | 635      | 6        | 42       | 93       | 16.1K    | 8         | 25        |
| <b>Coverage (x)</b>                         | 158.4    | 96.6     | 160      | 201.6    | 198.8    | 214.4    | 190.8    | 161.6    | 115.6    | 171.6     | 123.6     |

4

5 <sup>a</sup> SOLiD5500, Single-end, 75bp reads
