# Supplementary material
Source: PubMed Central journal article supplement (PMC4187745)
Supplement: JCM.01144-14_zjm999093733so2.pdf [file JCM.01144-14_zjm999093733so2.pdf]

1 **Table S2. Genomic characteristics of large-scale deletions between clinical *M. abscessus***  
 2 **isolates and the reference type strain, ATCC19977<sup>T</sup>.**

| Characteristic                       | Deletion Region |    |        |      |      |      |
|--------------------------------------|-----------------|----|--------|------|------|------|
|                                      | A               | B  | C      | D    | E    | F    |
| Size (Kb)                            | 33              | 31 | 62/82  | 64   | 38   | 83   |
| GC (%)                               | 64.5            | 63 | 59.6   | 62.4 | 60.8 | 61.7 |
| No. of genes                         | 37              | 31 | 92/110 | 70   | 32   | 87   |
| <b>Sequence Homology<sup>a</sup></b> |                 |    |        |      |      |      |
| <b>BLAST Results</b>                 |                 |    |        |      |      |      |
| Plasmid                              | +               | -  | -      | -    | -    | +    |
| Transposon                           | +               | -  | -      | -    | -    | +    |
| Mycobacteriophage                    | -               | -  | +      | -    | -    | -    |
| <i>M. abscessus</i>                  | +               | +  | -      | +    | +    | +    |
| Other RGM <sup>b</sup>               | +               | -  | -      | +    | +    | +    |
| SGM <sup>c</sup>                     | +               | -  | -      | +    | -    | +    |
| Other Actinobacteria                 | +               | +  | -      | +    | +    | +    |

3  
 4 <sup>a</sup> Sequence homology is defined as  $\geq 70\%$  sequence identity,  $\geq 30\%$  query coverage and E-  
 5 value of 0.0 using the blastn algorithm versus the NCBI non-redundant nt sequence database  
 6 <sup>b</sup> RGM = other rapidly growing Mycobacteria, not *M. abscessus*  
 7 <sup>c</sup> SGM = slowly growing Mycobacteria
